# Supplementary material
Source: PubMed Central journal article supplement (PMC6352496)
Supplement: Supp_Data.pdf [file Supp_Data.pdf]

## Supplementary Data

### Survey Questions Regarding Combination Therapy

1. Do you prescribe and adjust levothyroxine therapy for patients with hypothyroidism?
  - a. If yes, please complete rest of survey
  - b. If no, thank you and you do not need to complete survey

### Please answer some questions about yourself and your practice

2. How many years have you been in practice?
  - a. Currently in training
  - b. <5 years
  - c. 5–10 years
  - d. 10–20 years
  - e. >20 years
3. Where do you practice?
  - a. North America
    - i. Please identify country
  - b. South America
    - i. Please identify country
  - c. Europe
    - i. Please identify country
  - d. Asia
    - i. Please identify country
  - e. Other
    - i. Please identify country
4. Which best describes your specialty?
  - a. Endocrinologist
  - b. Surgeon
  - c. Nuclear medicine physician
  - d. Internist or primary-care physician
  - e. Other
    - i. Please identify

**Please answer the following questions about patients being treated for hypothyroidism. All patients have normal vital signs, are being treated for overt hypothyroidism, have been taking levothyroxine for at least 5 years, and are fully adherent to their therapy. None of the women are planning a pregnancy.**

5. A 29-year-old woman with Hashimoto's hypothyroidism is taking 100 µg of levothyroxine. She feels well. Physical examination suggests she is clinically euthyroid. Her BMI and laboratory values are below.

| <i>Parameter</i>         | <i>Patient value</i> | <i>Normal range</i> |
|--------------------------|----------------------|---------------------|
| BMI (kg/m <sup>2</sup> ) | 25                   | 18.5–24.9           |
| TSH (mIU/L)              | 2.2                  | 0.4–4.0             |
| fT4 (ng/dL)              | 1.3                  | 0.8–1.8             |
| TT3 (ng/dL)              | 120                  | 80–180              |

Which would you do?

- a. Continue current levothyroxine
- b. Increase levothyroxine dose

- c. Add 2.5 µg liothyronine (Cytomel) twice daily and reduce levothyroxine
  - d. Add 2.5 µg liothyronine (Cytomel) twice daily to current levothyroxine
  - e. Replace levothyroxine with thyroid extract (e.g., armour thyroid)
  - f. Replace levothyroxine with liothyronine (Cytomel) as single therapy
6. A 29-year-old woman with Hashimoto's hypothyroidism is taking 100 µg of levothyroxine. She is frustrated because she is gaining weight despite regular exercise, is tired throughout the day, and has poor memory and work performance. Physical examination suggests she is clinically euthyroid. Her BMI and laboratory values are below.

| <i>Parameter</i>         | <i>Patient value</i> | <i>Normal range</i> |
|--------------------------|----------------------|---------------------|
| BMI (kg/m <sup>2</sup> ) | 25                   | 18.5–24.9           |
| TSH (mIU/L)              | 2.2                  | 0.4–4.0             |
| fT4 (ng/dL)              | 1.3                  | 0.8–1.8             |
| TT3 (ng/dL)              | 120                  | 80–180              |

Which would you do?

- a. Continue current levothyroxine
- b. Increase levothyroxine dose
- c. Add 2.5 µg liothyronine (Cytomel) twice daily and reduce levothyroxine
- d. Add 2.5 µg liothyronine (Cytomel) twice daily to current levothyroxine
- e. Replace levothyroxine with thyroid extract (e.g., armour thyroid)
- f. Replace levothyroxine with liothyronine (Cytomel) as single therapy

7. A 29-year-old woman with Hashimoto's hypothyroidism is taking 100 µg of levothyroxine. She is frustrated because she is gaining weight despite regular exercise, is tired throughout the day, and has poor memory and work performance. Physical examination suggests she is clinically euthyroid. Her BMI and laboratory values are below.

| <i>Parameter</i>         | <i>Patient value</i> | <i>Normal range</i> |
|--------------------------|----------------------|---------------------|
| BMI (kg/m <sup>2</sup> ) | 25                   | 18.5–24.9           |
| TSH (mIU/L)              | 3.9                  | 0.4–4.0             |
| fT4 (ng/dL)              | 1.3                  | 0.8–1.8             |
| TT3 (ng/dL)              | 120                  | 80–180              |

Which would you do?

- a. Continue current levothyroxine
- b. Increase levothyroxine dose
- c. Add 2.5 µg liothyronine (Cytomel) twice daily and reduce levothyroxine
- d. Add 2.5 µg liothyronine (Cytomel) twice daily to current levothyroxine

- e. Replace levothyroxine with thyroid extract (e.g., armour thyroid)
  - f. Replace levothyroxine with liothyronine (Cytomel) as single therapy
8. A 29-year-old woman with Hashimoto's hypothyroidism is taking 100 µg of levothyroxine. She is frustrated because she is gaining weight despite regular exercise, is tired throughout the day, and has poor memory and work performance. Physical examination suggests she is clinically euthyroid. Her BMI and laboratory values are below.

| <i>Parameter</i>         | <i>Patient value</i> | <i>Normal range</i> |
|--------------------------|----------------------|---------------------|
| BMI (kg/m <sup>2</sup> ) | 25                   | 18.5–24.9           |
| TSH (mIU/L)              | 2.2                  | 0.4–4.0             |
| fT4 (ng/dL)              | 1.3                  | 0.8–1.8             |
| TT3 (ng/dL)              | 75                   | 80–180              |

Which would you do?

- a. Continue current levothyroxine
  - b. Increase levothyroxine dose
  - c. Add 2.5 µg liothyronine (Cytomel) twice daily and reduce levothyroxine
  - d. Add 2.5 µg liothyronine (Cytomel) twice daily to current levothyroxine
  - e. Replace levothyroxine with thyroid extract (e.g., armour thyroid)
  - f. Replace levothyroxine with liothyronine (Cytomel) as single therapy
9. A 29-year-old woman with Hashimoto's hypothyroidism is taking 100 µg of levothyroxine. She is frustrated because she is gaining weight despite regular exercise, is tired throughout the day, and has poor memory and work performance. Physical examination suggests she is clinically euthyroid. Her BMI and laboratory values are below.

| <i>Parameter</i>         | <i>Patient value</i> | <i>Normal range</i> |
|--------------------------|----------------------|---------------------|
| BMI (kg/m <sup>2</sup> ) | 25                   | 18.5–24.9           |
| TSH (mIU/L)              | 3.9                  | 0.4–4.0             |
| fT4 (ng/dL)              | 1.3                  | 0.8–1.8             |
| TT3 (ng/dL)              | 75                   | 80–180              |

Which would you do?

- a. Continue current levothyroxine
  - b. Increase levothyroxine dose
  - c. Add 2.5 µg liothyronine (Cytomel) twice daily and reduce levothyroxine
  - d. Add 2.5 µg liothyronine (Cytomel) twice daily to current levothyroxine
  - e. Replace levothyroxine with thyroid extract (e.g., armour thyroid)
  - f. Replace levothyroxine with liothyronine (Cytomel) as single therapy
10. A 29-year-old woman with Hashimoto's hypothyroidism is taking 100 µg of levothyroxine. She is frustrated because she is gaining weight despite

regular exercise, is tired throughout the day, and has poor memory and work performance. She requests "combination" therapy. Physical examination suggests she is clinically euthyroid. Her BMI and laboratory values are below.

| <i>Parameter</i>         | <i>Patient value</i> | <i>Normal range</i> |
|--------------------------|----------------------|---------------------|
| BMI (kg/m <sup>2</sup> ) | 25                   | 18.5–24.9           |
| TSH (mIU/L)              | 2.2                  | 0.4–4.0             |
| fT4 (ng/dL)              | 1.3                  | 0.8–1.8             |
| TT3 (ng/dL)              | 75                   | 80–180              |

Which would you do?

- a. Continue current levothyroxine
  - b. Increase levothyroxine dose
  - c. Add 2.5 µg liothyronine (Cytomel) twice daily and reduce levothyroxine
  - d. Add 2.5 µg liothyronine (Cytomel) twice daily to current levothyroxine
  - e. Replace levothyroxine with thyroid extract (e.g., armour thyroid)
  - f. Replace levothyroxine with liothyronine (Cytomel) as single therapy
11. A 29-year-old woman with post-surgical hypothyroidism following a total thyroidectomy is taking 100 µg of levothyroxine regularly. She is frustrated because she is gaining weight despite regular exercise, is tired throughout the day, and has poor memory and work performance. She requests "combination" therapy. Physical examination suggests she is clinically euthyroid. Her BMI and laboratory values are below.

| <i>Parameter</i>         | <i>Patient value</i> | <i>Normal range</i> |
|--------------------------|----------------------|---------------------|
| BMI (kg/m <sup>2</sup> ) | 25                   | 18.5–24.9           |
| TSH (mIU/L)              | 2.2                  | 0.4–4.0             |
| fT4 (ng/dL)              | 1.3                  | 0.8–1.8             |
| TT3 (ng/dL)              | 75                   | 80–180              |

Which would you do?

- a. Continue current levothyroxine
  - b. Increase levothyroxine dose
  - c. Add 2.5 µg liothyronine (Cytomel) twice daily and reduce levothyroxine
  - d. Add 2.5 µg liothyronine (Cytomel) twice daily to current levothyroxine
  - e. Replace levothyroxine with thyroid extract (e.g., armour thyroid)
  - f. Replace levothyroxine with liothyronine (Cytomel) as single therapy
12. A 29-year-old woman with Hashimoto's hypothyroidism is taking 100 µg of levothyroxine regularly. She is frustrated because she is gaining weight despite regular exercise, is tired throughout the day, and has poor memory and work performance. She tells you that a previous physician added T3 to her regimen and she felt better. She requests a return to

“combination” therapy. Physical examination suggests she is clinically euthyroid. Her BMI and laboratory values are below.

| <i>Parameter</i>         | <i>Patient value</i> | <i>Normal range</i> |
|--------------------------|----------------------|---------------------|
| BMI (kg/m <sup>2</sup> ) | 25                   | 18.5–24.9           |
| TSH (mIU/L)              | 2.2                  | 0.4–4.0             |
| fT4 (ng/dL)              | 1.3                  | 0.8–1.8             |
| TT3 (ng/dL)              | 75                   | 80–180              |

Which would you do?

- Continue current levothyroxine
  - Increase levothyroxine dose
  - Add 2.5 µg liothyronine (Cytomel) twice daily and reduce levothyroxine
  - Add 2.5 µg liothyronine (Cytomel) twice daily to current levothyroxine
  - Replace levothyroxine with thyroid extract (e.g., armour thyroid)
  - Replace levothyroxine with liothyronine (Cytomel) as single therapy
13. A 29-year-old man with Hashimoto’s hypothyroidism is taking 100 µg of levothyroxine. He is frustrated because he is gaining weight despite regular exercise, is tired throughout the day, and has poor memory and work performance. He requests “combination” therapy. Physical examination suggests he is clinically euthyroid. His BMI and laboratory values are below.

| <i>Parameter</i>         | <i>Patient value</i> | <i>Normal range</i> |
|--------------------------|----------------------|---------------------|
| BMI (kg/m <sup>2</sup> ) | 25                   | 18.5–24.9           |
| TSH (mIU/L)              | 2.2                  | 0.4–4.0             |
| fT4 (ng/dL)              | 1.3                  | 0.8–1.8             |
| TT3 (ng/dL)              | 75                   | 80–180              |

Which would you do?

- Continue current levothyroxine
  - Increase levothyroxine dose
  - Add 2.5 µg liothyronine (Cytomel) twice daily and reduce levothyroxine
  - Add 2.5 µg liothyronine (Cytomel) twice daily to current levothyroxine
  - Replace levothyroxine with thyroid extract (e.g., armour thyroid)
  - Replace levothyroxine with liothyronine (Cytomel) as single therapy
14. A 29-year-old woman with Hashimoto’s hypothyroidism is taking 100 µg of levothyroxine. She is frustrated because she is gaining weight despite regular exercise, is tired throughout the day, and has poor memory and work performance. She previously participated in a study that showed that she had a genetic problem with converting T4 to T3. She requests “combination” therapy. Physical examination suggests she is clinically euthyroid. Her BMI and laboratory values are below.

| <i>Parameter</i>         | <i>Patient value</i> | <i>Normal range</i> |
|--------------------------|----------------------|---------------------|
| BMI (kg/m <sup>2</sup> ) | 25                   | 18.5–24.9           |
| TSH (mIU/L)              | 2.2                  | 0.4–4.0             |
| fT4 (ng/dL)              | 1.3                  | 0.8–1.8             |
| TT3 (ng/dL)              | 75                   | 80–180              |

Which would you do?

- Continue current levothyroxine
  - Increase levothyroxine dose
  - Add 2.5 µg liothyronine (Cytomel) twice daily and reduce levothyroxine
  - Add 2.5 µg liothyronine (Cytomel) twice daily to current levothyroxine
  - Replace levothyroxine with thyroid extract (e.g., armour thyroid)
  - Replace levothyroxine with liothyronine (Cytomel) as single therapy
15. A 59-year-old woman with Hashimoto’s hypothyroidism is taking 100 µg of levothyroxine. She is frustrated because she is gaining weight despite regular exercise, is tired throughout the day, and has poor memory and work performance. She requests “combination” therapy. Physical examination suggests she is clinically euthyroid. Her BMI and laboratory values are below.

| <i>Parameter</i>         | <i>Patient value</i> | <i>Normal range</i> |
|--------------------------|----------------------|---------------------|
| BMI (kg/m <sup>2</sup> ) | 25                   | 18.5–24.9           |
| TSH (mIU/L)              | 2.2                  | 0.4–4.0             |
| fT4 (ng/dL)              | 1.3                  | 0.8–1.8             |
| TT3 (ng/dL)              | 75                   | 80–180              |

Which would you do?

- Continue current levothyroxine
  - Increase levothyroxine dose
  - Add 2.5 µg liothyronine (Cytomel) twice daily and reduce levothyroxine
  - Add 2.5 µg liothyronine (Cytomel) twice daily to current levothyroxine
  - Replace levothyroxine with thyroid extract (e.g., armour thyroid)
  - Replace levothyroxine with liothyronine (Cytomel) as single therapy
16. A 29-year-old woman with Hashimoto’s hypothyroidism is taking 100 µg of levothyroxine. She is frustrated because she is gaining excessive weight despite regular exercise, is tired throughout the day, and has poor memory and work performance. She requests “combination” therapy. Physical examination suggests she is clinically euthyroid. Her BMI and laboratory values are below.

| <i>Parameter</i>         | <i>Patient value</i> | <i>Normal range</i> |
|--------------------------|----------------------|---------------------|
| BMI (kg/m <sup>2</sup> ) | 32                   | 18.5–24.9           |
| TSH (mIU/L)              | 2.2                  | 0.4–4.0             |
| fT4 (ng/dL)              | 1.3                  | 0.8–1.8             |
| TT3 (ng/dL)              | 75                   | 80–180              |

Which would you do?

- a. Continue current levothyroxine
  - b. Increase levothyroxine dose
  - c. Add 2.5  $\mu\text{g}$  liothyronine (Cytomel) twice daily and reduce levothyroxine
  - d. Add 2.5  $\mu\text{g}$  liothyronine (Cytomel) twice daily to current levothyroxine
  - e. Replace levothyroxine with thyroid extract (e.g., armour thyroid)
  - f. Replace levothyroxine with liothyronine (Cytomel) as single therapy
17. A 59-year-old woman with Hashimoto's hypothyroidism and steroid-induced osteoporosis is taking 100  $\mu\text{g}$  of levothyroxine. She is frustrated because she is gaining weight despite regular exercise, is tired throughout the day, and has poor memory and work performance. She requests "combination" therapy. Physical examination suggests she is clinically euthyroid. Her BMI and laboratory values are below.

| <i>Parameter</i>         | <i>Patient value</i> | <i>Normal range</i> |
|--------------------------|----------------------|---------------------|
| BMI (kg/m <sup>2</sup> ) | 25                   | 18.5–24.9           |
| TSH (mIU/L)              | 2.2                  | 0.4–4.0             |
| fT4 (ng/dL)              | 1.3                  | 0.8–1.8             |
| TT3 (ng/dL)              | 75                   | 80–180              |

Which would you do?

- a. Continue current levothyroxine
- b. Increase levothyroxine dose
- c. Add 2.5  $\mu\text{g}$  liothyronine (Cytomel) twice daily and reduce levothyroxine
- d. Add 2.5  $\mu\text{g}$  liothyronine (Cytomel) twice daily to current levothyroxine
- e. Replace levothyroxine with thyroid extract (e.g., armour thyroid)
- f. Replace levothyroxine with liothyronine (Cytomel) as single therapy

SUPPLEMENTARY TABLE S1. PATIENT CHARACTERISTICS AFFECTING PHYSICIAN PRESCRIBING  
OF LT4 VERSUS ANY T3-CONTAINING THERAPY

| <i>(A) Univariate analyses</i>   |                           |                | <i>(B) Multivariate analyses</i> |                         |                |
|----------------------------------|---------------------------|----------------|----------------------------------|-------------------------|----------------|
| <i>Patient characteristic</i>    | <i>Unadjusted OR [CI]</i> | <i>p-Value</i> | <i>Patient characteristic</i>    | <i>Adjusted OR [CI]</i> | <i>p-Value</i> |
| Symptom, Y vs. N                 | 101.4 [33.2–309.2]        | <0.0001        | Symptom, Y vs. N                 | 25.6 [9.0–73.0]         | <0.0001        |
| T3, 75 vs. 120 ng/dL             | 10.7 [8.6–13.2]           | <0.0001        | T3, 75 vs. 120 ng/dL             | 2.6 [2.1–3.3]           | <0.0001        |
| Requests LT3, Y vs. N            | 6.7 [5.7–7.9]             | <0.0001        | TSH, 2.2 vs 3.9 mIU/L            | 2.4 [1.9–2.9]           | <0.0001        |
| TSH, 2.2 vs. 3.9 mIU/L           | 5.4 [4.3–6.7]             | <0.0001        | Polymorphism, Y vs. N            | 2.4 [1.9–2.9]           | <0.0001        |
| Polymorphism, Y vs. N            | 4.9 [4.1–5.9]             | <0.0001        | Requests LT3, Y vs. N            | 2.3 [1.9–2.8]           | <0.0001        |
| LT3 preference, Y vs. N          | 3.2 [2.8–3.8]             | <0.0001        | LT3 preference, Y vs. N          | 1.6 [1.4–1.9]           | <0.0001        |
| Athyreotic, Y vs. N              | 2.0 [1.8–2.3]             | <0.0001        | Athyreotic, Y vs. N              | 1.03 [0.9–1.2]          | 0.5634         |
| BMI, 32 vs. 25 kg/m <sup>2</sup> | 2.0 [1.7–2.2]             | <0.0001        | BMI, 32 vs. 25 kg/m <sup>2</sup> | 1.0 [0.9–1.1]           | 0.8745         |
| Male, M vs. F                    | 1.8 [1.6–2.0]             | <0.0001        | Male, M vs. F                    | 0.9 [0.8–1.1]           | 0.2827         |
| Age, 59 vs. 29 years             | 1.2 [1.0–1.3]             | 0.0169         | Comorbidity, Y vs. N             | 0.8 [0.7–0.9]           | 0.0002         |
| Comorbidity, Y vs. N             | 1.002 [0.86–1.17]         | 0.9828         | Age, 59 vs. 29 years             | 0.7 [0.6–0.8]           | <0.0001        |

SUPPLEMENTARY TABLE S2. PATIENT CHARACTERISTICS AFFECTING PHYSICIAN PRESCRIBING CONTINUED LT4 VERSUS INCREASING LT4 VERSUS ADDING LT3 TO LT4 VERSUS REPLACING LT4 WITH T3-CONTAINING THERAPY

| <i>Patient scenario</i>          | <i>Therapeutic options</i> | <i>(A) Univariate analyses</i> |           |        | <i>(B) Multivariate analyses</i> |           |       | <i>p-Value for model</i> |
|----------------------------------|----------------------------|--------------------------------|-----------|--------|----------------------------------|-----------|-------|--------------------------|
|                                  |                            | <i>Unadjusted OR</i>           | <i>CI</i> |        | <i>Adjusted OR</i>               | <i>CI</i> |       |                          |
| Symptoms, Y vs. N                | 1 vs. 2                    | 77.8                           | 31.6      | 191.7  | 48.8                             | 18.4      | 129.3 | <0.0001                  |
|                                  | 1 vs. 3                    | 582.0                          | 80.9      | >999.9 | 99.6                             | 13.3      | 748.5 |                          |
|                                  | 1 vs. 4                    | 331.3                          | 77.2      | >999.9 | 46.2                             | 9.2       | 232.3 |                          |
| Serum TSH, 2.2 vs. 3.9 mIU/L     | 1 vs. 2                    | 0.03                           | 0.02      | 0.03   | 0.03                             | 0.02      | 0.05  | <0.0001                  |
|                                  | 1 vs. 3                    | 10.5                           | 5.8       | 18.8   | 3.5                              | 1.8       | 6.8   |                          |
|                                  | 1 vs. 4                    | 0.65                           | 0.46      | 0.92   | 0.22                             | 0.13      | 0.35  |                          |
| Serum T3, 75 vs. 120 ng/dL       | 1 vs. 2                    | 1.15                           | 0.95      | 1.4    | 1.6                              | 1.2       | 2.2   | <0.0001                  |
|                                  | 1 vs. 3                    | 34.0                           | 24.0      | 48.1   | 3.9                              | 2.4       | 6.5   |                          |
|                                  | 1 vs. 4                    | 24.6                           | 17.4      | 34.9   | 8.0                              | 5.0       | 12.8  |                          |
| Requests LT3, Y vs. N            | 1 vs. 2                    | 0.37                           | 0.30      | 0.45   | 0.64                             | 0.36      | 1.1   | <0.0001                  |
|                                  | 1 vs. 3                    | 26.1                           | 19.9      | 34.2   | 6.6                              | 3.9       | 11.1  |                          |
|                                  | 1 vs. 4                    | 8.7                            | 6.8       | 11.1   | 3.8                              | 2.2       | 6.7   |                          |
| Athyreotic, Y vs. N              | 1 vs. 2                    | 0.88                           | 0.60      | 1.3    | 1.9                              | 1.0       | 3.7   | 0.1527                   |
|                                  | 1 vs. 3                    | 2.5                            | 1.8       | 3.4    | 1.1                              | 0.65      | 1.9   |                          |
|                                  | 1 vs. 4                    | 3.0                            | 2.1       | 4.3    | 1.6                              | 0.9       | 3.0   |                          |
| LT3 preference, Y vs. N          | 1 vs. 2                    | 0.35                           | 0.20      | 0.59   | 0.51                             | 0.24      | 1.1   | <0.0001                  |
|                                  | 1 vs. 3                    | 5.0                            | 3.6       | 7.0    | 2.8                              | 1.7       | 4.9   |                          |
|                                  | 1 vs. 4                    | 3.8                            | 2.6       | 5.5    | 2.5                              | 1.4       | 4.5   |                          |
| Male, M vs. F                    | 1 vs. 2                    | 0.70                           | 0.47      | 1.0    | 1.4                              | 0.71      | 2.7   | 0.7077                   |
|                                  | 1 vs. 3                    | 2.3                            | 1.7       | 3.2    | 0.97                             | 0.57      | 1.7   |                          |
|                                  | 1 vs. 4                    | 1.9                            | 1.3       | 2.7    | 0.90                             | 0.50      | 1.7   |                          |
| Polymorphism, Y vs. N            | 1 vs. 2                    | 0.78                           | 0.47      | 1.3    | 1.4                              | 0.66      | 3.1   | <0.0001                  |
|                                  | 1 vs. 3                    | 9.5                            | 6.5       | 13.9   | 6.2                              | 3.5       | 10.8  |                          |
|                                  | 1 vs. 4                    | 12.3                           | 8.2       | 18.4   | 9.2                              | 5.0       | 16.8  |                          |
| Age, 59 vs. 29 years             | 1 vs. 2                    | 0.36                           | 0.27      | 0.48   | 0.77                             | 0.40      | 1.5   | 0.0002                   |
|                                  | 1 vs. 3                    | 1.4                            | 1.1       | 1.7    | 0.57                             | 0.34      | 0.96  |                          |
|                                  | 1 vs. 4                    | 0.52                           | 0.39      | 0.70   | 0.26                             | 0.14      | 0.48  |                          |
| BMI, 32 vs. 25 kg/m <sup>2</sup> | 1 vs. 2                    | 0.76                           | 0.51      | 1.1    | 1.6                              | 0.80      | 3.1   | 0.3589                   |
|                                  | 1 vs. 3                    | 2.3                            | 1.6       | 3.2    | 0.99                             | 0.58      | 1.7   |                          |
|                                  | 1 vs. 4                    | 2.7                            | 1.9       | 3.9    | 1.4                              | 0.79      | 2.6   |                          |
| Comorbidity, Y vs. N             | 1 vs. 2                    | 0.33                           | 0.22      | 0.49   | 0.67                             | 0.36      | 1.26  | 0.0423                   |
|                                  | 1 vs. 3                    | 1.0                            | 0.78      | 1.4    | 0.55                             | 0.34      | 0.90  |                          |
|                                  | 1 vs. 4                    | 0.42                           | 0.29      | 0.63   | 0.50                             | 0.27      | 0.91  |                          |

Continuing LT4=therapeutic option 1 (reference), increasing LT4=therapeutic option 2, adding LT3 to same or reduced LT4=option 3, replacing LT4 with DTE or LT3=option 4.

SUPPLEMENTARY TABLE S3. UNIVARIATE ANALYSES OF DETAILED COUNTRY COMPARISONS

| <i>(A) Comparison of binary response options<br/>LT4 vs. any T3-containing therapy</i> |                          |           |           |                |
|----------------------------------------------------------------------------------------|--------------------------|-----------|-----------|----------------|
| <i>Country of practice</i>                                                             |                          | <i>OR</i> | <i>CI</i> | <i>p-Value</i> |
| North America vs. others                                                               |                          | 1.8       | 1.4–2.4   | <0.0001        |
| South America vs. others                                                               |                          | 0.4       | 0.2–0.7   | 0.002          |
| Europe vs. others                                                                      |                          | 0.6       | 0.4–0.9   | 0.009          |
| Asia vs. others                                                                        |                          | 0.8       | 0.5–1.3   | 0.36           |
| North American vs. South America                                                       |                          | 2.8       | 1.6–5.0   | 0.0003         |
| North America vs. Europe                                                               |                          | 1.8       | 1.3–2.7   | 0.0014         |
| North America vs. Asia                                                                 |                          | 1.5       | 0.9–2.7   | 0.11           |
| <i>(B) Comparison of grouped response options<sup>a</sup></i>                          |                          |           |           |                |
| <i>Country of practice</i>                                                             | <i>Treatment options</i> | <i>OR</i> | <i>CI</i> | <i>p-Value</i> |
| North America vs. others                                                               | 1 vs. 2                  | 0.89      | 0.66–1.2  | 0.45           |
| North America vs. others                                                               | 1 vs. 3                  | 1.8       | 1.2–2.7   | 0.0054         |
| North America vs. others                                                               | 1 vs. 4                  | 1.6       | 0.95–2.6  | 0.076          |
| South America vs. others                                                               | 1 vs. 2                  | 0.49      | 0.27–0.88 | 0.017          |
| South America vs. others                                                               | 1 vs. 3                  | 0.25      | 0.1–0.59  | 0.0016         |
| South America vs. others                                                               | 1 vs. 4                  | 0.41      | 0.15–1.1  | 0.07           |
| Europe vs. others                                                                      | 1 vs. 2                  | 1.3       | 0.93–1.9  | 0.12           |
| Europe vs. others                                                                      | 1 vs. 3                  | 0.77      | 0.45–1.3  | 0.34           |
| Europe vs. others                                                                      | 1 vs. 4                  | 0.51      | 0.27–0.98 | 0.04           |
| Asia vs. others                                                                        | 1 vs. 2                  | 0.85      | 0.49–1.5  | 0.55           |
| Asia vs. others                                                                        | 1 vs. 3                  | 0.65      | 0.3–1.4   | 0.28           |
| Asia vs. others                                                                        | 1 vs. 4                  | 0.96      | 0.4–2.3   | 0.92           |
| North American vs. South America                                                       | 1 vs. 2                  | 1.8       | 1.0–3.3   | 0.047          |
| North American vs. South America                                                       | 1 vs. 3                  | 4.6       | 1.9–11.0  | 0.0007         |
| North American vs. South America                                                       | 1 vs. 4                  | 2.7       | 1.0–7.4   | 0.026          |
| North America vs. Europe                                                               | 1 vs. 2                  | 0.76      | 0.52–1.1  | 0.14           |
| North America vs. Europe                                                               | 1 vs. 3                  | 1.5       | 0.9–2.6   | 0.12           |
| North America vs. Europe                                                               | 1 vs. 4                  | 2.1       | 1.1–4.0   | 0.033          |
| North America vs. Asia                                                                 | 1 vs. 2                  | 1.1       | 0.64–1.9  | 0.71           |
| North America vs. Asia                                                                 | 1 vs. 3                  | 1.8       | 0.85–4.0  | 0.12           |
| North America vs. Asia                                                                 | 1 vs. 4                  | 1.2       | 0.5–3.0   | 0.65           |

<sup>a</sup>Continuing LT4=therapeutic option 1 (reference), increasing LT4=therapeutic option 2, adding LT3 to same or reduced LT4=option 3, replacing LT4 with DTE or LT3=option 4.
